# Supplementary material
Source: Springer Nature journal article supplement (https://www.springermedizin.de/resource/supplementary/13075_2004_1205_MOESM3_ESM.pdf/9689218)

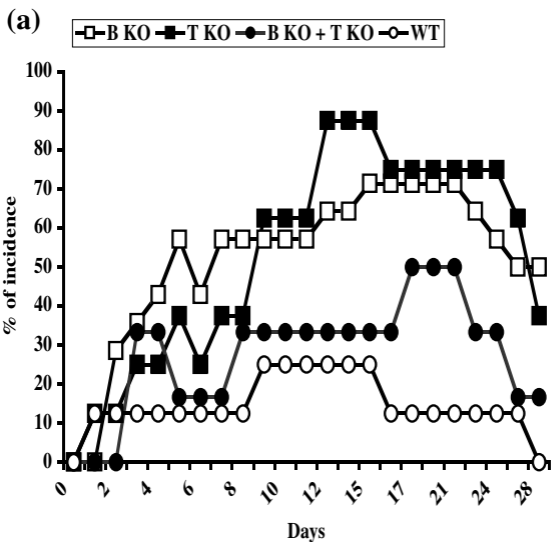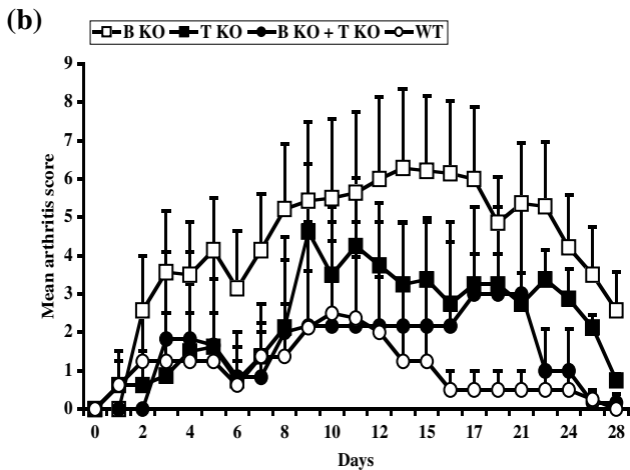

Supplement: MOESM3 [file 9689218]
